# Supplementary material
Source: Research Square preprint supplement (doi:10.21203/rs.3.rs-8993132/v1)
Supplement: Supplementary file 1 [file bc1bf1183065646169e18ec4.docx]

Supplementary materials

**Table S1.** Checklist for the 31P 2D MRSI study

| 1. Hardware |  |
| --- | --- |
| a. Field strength | 3.0-T |
| b. Manufacturer | Philips Healthcare, Elition, Best, the Netherlands |
| c. Model | R5.9.0 SWID0269 |
| d. RF coils | A 31P transmit-receive coil (P-140 Coil). Single-channel transmit, and single-channel receive.  30-channel phase-array 1H coil for 1H anatomical and functional imaging.  Two-channel QBC 1H coil for localization image acquisition. |
| e. Additional hardware | N.A. |
| 2. Acquisition |  |
| a. Pulse sequence | 31P 2D MRSI |
| b. Volume of interest | HCC lesion and Liver background |
| c. Nominal VOI size | 45 ⨉ 45 ⨉ 60mm3 |
| d. Repetition Time (TR), Echo Time (TE) | TR = 4000 ms, TE = 0.2 ms |
| e. Total number of excitations or acquisitions per spectrum (NA) | 10 acquisition per spectrum for the central *k* space (NA = 10), a *k* space-weighting method was used to decrease the scan time. |
| f. Additional sequence parameters | 2D MRSI; Samples = 2048; Spectral bandwidth =3000 Hz; Frequency offset = -3.0 ppm; FOV = 195 ⨉ 195 ⨉ 60mm3; Matrix size = 4 ⨉ 4; Acquisition (ACQ) voxel size = 48.8 ⨉ 48.8 ⨉ 60 mm3; Reconstruction (REC) voxel size = 19.5 ⨉ 19.5 ⨉ 60 mm3; REC matrix size = 10 ⨉ 10. |
| g. Water suppression method | N.A. |
| h. Shimming method, reference peak, and thresholds for “acceptance of shim” chosen | 2nd-order pencil-beam (PB)-based shimming. The full width half maximum (FWHM) value for the proton was used to evaluate the shimming quality. |
| i. Triggering or motion correction method | No; however, higher NSA factor may reduce motion-related artefacts. |
| 3. Data analysis methods and outputs |  |
| a. Analysis software | Embedded SpectroView Software. |
| b. Processing steps deviating from quoted reference or product analysis software | No deviation from the default processing steps. |
| c. Output measure | Ratio |
| d. Quantification references and assumptions, fitting model assumptions | Quantification relative to total 31P signal, which was assumed to be constant. |
| 5. Data Quality |  |
| a. Reported variables | SNR, relative ratios. |
| b. Data exclusion criteria | Voxels with low SNR (SNR < 4) and/or contamination from skeletal muscle (PCr > α-ATP) and/or the gall bladder (PtdC > α-ATP) were excluded (but this was not the case for any of the tumor voxels). |
| c. Quality measures of postprocessing Model fitting | The fitting results were then reviewed by two senior researchers: an imaging expert with 11 years of MRI experience, who verified that the voxels were within the lesion, and a supervisor with 7 years of MRSI experience, who ensured that (a) the baseline was smooth enough to capture slow background variations, (b) the residuals appeared noise-like across the entire fitting region, (c) the fitted profile accurately captured the core and wings without obvious under- or overestimation, and (d) the positions of each fitted peak aligned with expected transitions |
| d. Sample Spectrum | Figure 2 |

**Table S2:** SpectroView peak fitting parameter settings.

| **Label** | **Chem Shift (ppm)** | **Multiplet** | **J-coupling (Hz)** | **Guess Width** | **Freq Group** | **Width Group** |
| --- | --- | --- | --- | --- | --- | --- |
| NADH | -8.55 | 1 | 16.3 | 0.01 | 1 | 1 |
| Pi | 4.77 | 1 | 0 | 0.01 | 1 | 3 |
| GPC | 2.94 | 1 | 0 | 0.01 | 1 | 3 |
| GPE | 3.47 | 1 | 0 | 0.01 | 1 | 3 |
| PC | 6.21 | 1 | 0 | 0.01 | 1 | 2 |
| PCr | 0 | 1 | 0 | 0.01 | 1 | 1 |
| PE | 6.74 | 1 | 0 | 0.01 | 1 | 2 |
| Pi | 4.77 | 1 | 0 | 0.01 | 1 | 3 |
| α-ATP | -7.64 | 1 | 17 | 0.01 | 1 | 2 |
| β-ATP | -16.35 | 3 | 17 | 0.01 | 1 | 2 |
| γ-ATP | -2.59 | 2 | 17 | 0.01 | 1 | 2 |

Signals were fitted using an iterative nonlinear least-squares technique, where the spectra are modeled as the sum of a set of peaks, each represented as a linear combination of Gaussian and Lorentzian functions, along with a baseline modeled as a polynomial function of position. Specifically, the fitting algorithm developed by Marquardt and Levenberg is employed, efficiently searching for the optimal fit. This process generates a list of optimized peak heights, widths, positions, and areas.

**Table S3.** Characteristics of patients with HCC in the early-stage group

| **Characteristic** | **Early-Stage Group** | | ***p*** |
| --- | --- | --- | --- |
| **Ki-67 ≤ 20%** | **Ki-67 > 20%** |
| **Number of patients** | 13 | 10 |  |
| **Age (years)** | 64.00 (59.00, 67.00) | 66.00 (62.50, 70.00) | 0.419 |
| **Gender** |  |  |  |
| **Male (female)** | 9 (4) | 7 (3) | >0.999 |
| **Lesions characteristic** |  |  |  |
| **Tumor size (mm)** | 24.00 (21.00, 36.00) | 38.50 (23.00, 62.25) | 0.336 |
| **Solitary tumor** | 11 (84.61) | 9 (90.00) | >0.999 |
| **Tumors 2-3 lesions** | 2 (15.38) | 1 (10.00) |
| **Tumors >3 lesions** | 0 | 0 |
| **HBV infection** | 11 (84.61) | 8 (80.00) | >0.999 |
| **Laboratory Information** |  |  |  |
| **AFP (ng/mL)** | 2.73 (1.81, 5.43) | 111.05 (7.13, 310.91) | 0.028 |
| **PAB (mg/L)** | 170.54 ± 62.91 | 147.20 ± 55.35 | 0.364 |
| **ALB (mg/L)** | 93.00 (39.00, 104.00) | 39.50 (36.50, 59.75) | 0.082 |
| **TP (g/L)** | 64.00 (63.00, 67.00) | 65.00 (61.50, 65.00) | 0.452 |
| **ALT (U/L)** | 43.00 (26.00, 178.00) | 41.00 (15.75, 180.75) | 0.926 |
| **AST (U/L)** | 34.00 (22.00, 57.00) | 49.00 (24.00, 71.25) | 0.438 |
| **INR** | 1.04 (1.03, 1.08) | 1.07 (1.02, 1.17) | 0.686 |
| **PT (s)** | 12.70 ± 1.00 | 13.34 ± 1.46 | 0.225 |
| **PLT (×109/L)** | 131.62 ± 41.52 | 146.80 ± 47.50 | 0.423 |

Data are presented as medians with IQR, mean ± SD, or number (percentage). AFP, Alpha-fetoprotein; ALB, albumin; ALT, alanine aminotransferase; AST, aspartate aminotransferase; INR, international normalized ratio; PAB, prealbumin; PLT, platelet; PT, prothrombin time; SD, standard deviation; TP, total protein.

**p* < 0.017; ***p* < 0.003; ****p* < 0.0003 (Independent-samples t test, Mann–Whitney test, chi-square test, or Fisher’s exact test with a Bonferroni correction).

**Table S4.** Characteristics of patients with HCC in the advanced-stage group

| **Characteristic** | **Advanced-Stage Group** | | ***p*** |
| --- | --- | --- | --- |
| **Response** | **Nonresponse** |
| **Number of patients** | 8 | 13 |  |
| **Age (years)** | 48.12 ± 12.12 | 60.75 ± 9.87 | 0.020 |
| **Gender** |  |  |  |
| **Male (female)** | 8 (0) | 13 (0) | >0.999 |
| **Lesions characteristic** |  |  |  |
| **Tumor size (mm)** | 156.88 ± 74.25 | 110.83 ± 53.99 | 0.116 |
| **Solitary tumor** | 2 (25.00) | 4 (30.77) | 0.668 |
| **Tumors 2-3 lesions** | 2 (25.00) | 5 (38.46) |
| **Tumors >3 lesions** | 4 (50.00) | 4 (30.77) |
| **HBV infection** | 7 (87.50) | 12 (92.31) | >0.999 |
| **Laboratory Information** |  |  |  |
| **AFP (ng/mL)** | 33609.50 (4146.21, 42355.50) | 204.92 (31.34, 979.50) | 0.033 |
| **PAB (mg/L)** | 114.38 ± 47.07 | 165.46 ± 59.10 | 0.053 |
| **ALB (mg/L)** | 38.50 (35.75, 72.50) | 41.00 (33.00, 175.00) | 0.828 |
| **TP (g/L)** | 68.00 ± 5.71 | 66.92 ± 6.53 | 0.705 |
| **ALT (U/L)** | 31.00 (23.75, 40.50) | 33.00 (23.00, 40.00) | 0.971 |
| **AST (U/L)** | 108.50 (70.25, 137.50) | 51.00 (44.00, 75.00) | 0.246 |
| **INR** | 1.17 (1.11, 1.23) | 1.04 (1.02, 1.08) | 0.042 |
| **PT (s)** | 13.85 (13.38, 14.40) | 12.40 (11.80, 12.90) | 0.082 |
| **PLT (×109/L)** | 179.50 (158.00, 269.25) | 137.00 (128.00, 181.00) | 0.030 |
| **Treatment** |  |  |  |
| **HAIC** | 5 (62.50) | 10 (76.92) | 0.631 |
| **HAIC + HR** | 3 (37.50) | 3 (23.08) |
| **Tumor response** | CR/pCR/PR/MPR | SD/PD/AMPR |  |

Data are presented as medians with IQR, mean ± Std, or number (percentage). AFP, Alpha-fetoprotein; ALB, albumin; ALT, alanine aminotransferase; AMPR, absence of MPR; AST, aspartate aminotransferase; CR, complete response; HAIC, hepatic arterial infusion chemotherapy; HR, hepatic resection; INR, international normalized ratio; MPR, major pathologic response; PAB, prealbumin; pCR, pathologic complete response; PD, progressive disease; PLT, platelet; PR, partial response; PT, prothrombin time; SD, stable disease; Std, standard deviation; TP, total protein.

**p* < 0.017; ***p* < 0.003; ****p* < 0.0003 (Independent-samples t test, Mann–Whitney test, chi-square test, or Fisher’s exact test with a Bonferroni correction).

**Table S5.** Differences in 31P 2D MRSI metabolite ratios between HCC and liver background voxels

|  | **Background (n=37)** | **Lesion**  **(n=44)** | ***p*** |
| --- | --- | --- | --- |
| PME/PDE | 0.50 ± 0.18 | 0.91 ± 0.58 | **0.0003***** |
| PME/TPC | 0.14 ± 0.04 | 0.18 ± 0.08 | **0.0104*** |
| PME/(PME+PDE) | 0.33 ± 0.09 | 0.45 ± 0.15 | **0.0002***** |
| PME/γ-ATP | 0.73 ± 0.23 | 0.95 ± 0.53 | **0.0255*** |
| PC/PDE | 0.24 ± 0.11 | 0.38 ± 0.31 | **0.0158*** |
| PC/TPC | 0.06 ± 0.02 | 0.08 ± 0.05 | 0.0912 |
| PC/(PME+PDE) | 0.15 ± 0.05 | 0.17 ± 0.10 | 0.1365 |
| PC/GPC | 0.36 ± 0.22 | 0.60 ± 0.51 | **0.0148*** |
| PC/GPE | 0.65 ± 0.57 | 0.83 ± 0.79 | 0.2722 |
| PC/PME | 0.43 ± 0.16 | 0.40 ± 0.14 | 0.388 |
| PC/Pi | 0.53 ± 0.27 | 0.64 ± 0.36 | 0.1426 |
| PC/γ-ATP | 0.31 ± 0.18 | 0.35 ± 0.23 | 0.3358 |
| PE/PDE | 0.28 ± 0.11 | 0.50 ± 0.30 | **0.0002***** |
| PE/TPC | 0.08 ± 0.04 | 0.11 ± 0.04 | **0.0235*** |
| PE/(PME+PDE) | 0.19 ± 0.07 | 0.25 ± 0.10 | **0.0029**** |
| PE/GPC | 0.48 ± 0.31 | 0.82 ± 0.54 | **0.0026**** |
| PE/GPE | 0.73 ± 0.53 | 1.12 ± 0.79 | **0.0209*** |
| PE/PC | 1.61 ± 1.03 | 1.38 ± 0.63 | 0.2614 |
| PE/Pi | 0.70 ± 0.39 | 1.12 ± 0.71 | **0.004**** |
| PE/γ-ATP | 0.41 ± 0.12 | 0.54 ± 0.25 | **0.0061**** |
| PDE/TPC | 0.28 ± 0.05 | 0.22 ± 0.08 | **0.0006***** |
| PDE/(PME+PDE) | 0.67 ± 0.09 | 0.55 ± 0.15 | **0.0002***** |
| PDE/γ-ATP | 1.36 ± 0.56 | 1.14 ± 0.49 | 0.0676 |
| GPC/PME | 1.13 ± 0.77 | 0.78 ± 0.50 | **0.0238*** |
| GPC/TPC | 0.16 ± 0.09 | 0.13 ± 0.05 | 0.0513 |
|  | **Background (n=37)** | **Lesion**  **(n=44)** | ***p*** |
| GPC/(PME+PDE) | 0.38 ± 0.16 | 0.31 ± 0.12 | **0.0414*** |
| GPC/PDE | 0.62 ± 0.17 | 0.60 ± 0.14 | 0.6652 |
| GPC/Pi | 1.92 ± 0.88 | 1.47 ± 0.73 | **0.0162*** |
| GPC/γ-ATP | 0.77 ± 0.43 | 0.65 ± 0.28 | 0.1465 |
| GPE/PME | 0.60 ± 0.40 | 0.49 ± 0.30 | 0.181 |
| GPE/TPC | 0.09 ± 0.05 | 0.09 ± 0.04 | 0.9159 |
| GPE/(PME+PDE) | 0.22 ± 0.11 | 0.21 ± 0.10 | 0.7652 |
| GPE/GPC | 0.59 ± 0.54 | 0.68 ± 0.48 | 0.4678 |
| GPE/PDE | 0.38 ± 0.17 | 0.40 ± 0.14 | 0.6652 |
| GPE/Pi | 1.00 ± 0.62 | 0.91 ± 0.65 | 0.5557 |
| GPE/γ-ATP | 0.44 ± 0.27 | 0.42 ± 0.22 | 0.8006 |
| γ-ATP/TPC | 0.20 ± 0.04 | 0.20 ± 0.06 | 0.727 |
| γ-ATP/(PME+PDE) | 0.48 ± 0.12 | 0.46 ± 0.16 | 0.7198 |
| Pi/PDE | 0.42 ± 0.15 | 0.53 ± 0.27 | **0.0466*** |
| Pi/PME | 0.72 ± 0.38 | 0.63 ± 0.36 | 0.2782 |
| Pi/TPC | 0.11 ± 0.05 | 0.11 ± 0.05 | 0.9969 |
| Pi/(PME+PDE) | 0.25 ± 0.11 | 0.25 ± 0.09 | 0.9291 |
| Pi/γ-ATP | 0.61 ± 0.38 | 0.61 ± 0.37 | 0.9941 |

Data are presented as medians with interquartile ranges or mean ± SD from HCC and background voxels. For each patient, metabolite levels were averaged across lesion voxels (HCC) and uncontaminated background liver voxels. PME comprises PE and PC; and PDE comprises GPE and GPC. ATP, Adenosine triphosphate; GPC, glycerophosphocholine; GPE, glycerophosphoethanolamine; PC, phosphocholine; PDE, phosphodiesters; PE, phosphoethanolamine; Pi, inorganic phosphate; PME, phosphomonoesters; 31P 2D MRSI, phosphorus-31 two-dimensional magnetic resonance spectroscopic imaging; TPC, total phosphorus content.

**p* < 0.05; ***p* < 0.01; ****p* < 0.001 (Mann–Whitney *U* test or independent-samples *t* test).

**Table S6.** Differences in 31P 2D MRSI metabolite ratios between early- and advanced-stage groups from HCC voxels

|  | **Early-Stage**  **(n = 23)** | **Advanced-Stage (n=21)** | ***p*** |
| --- | --- | --- | --- |
| PME/PDE | 0.71 ± 0.51 | 1.41 ± 0.70 | **0.0005**** |
| PME/TPC | 0.16 ± 0.06 | 0.23 ± 0.07 | **0.0015**** |
| PME/(PME+PDE) | 0.38 ± 0.11 | 0.58 ± 0.15 | **< 0.0001***** |
| PME/γ-ATP | 0.86 ± 0.40 | 1.09 ± 0.52 | 0.1120 |
| PC/PDE | 0.30 ± 0.23 | 0.52 ± 0.34 | 0.0172 |
| PC/TPC | 0.07 ± 0.03 | 0.08 ± 0.05 | 0.3248 |
| PC/(PME+PDE) | 0.17 ± 0.06 | 0.20 ± 0.12 | 0.2046 |
| PC/GPC | 0.54 ± 0.35 | 0.90 ± 0.64 | 0.0266 |
| PC/GPE | 0.66 ± 0.36 | 1.13 ± 0.81 | 0.0195 |
| PC/PME | 0.43 ± 0.10 | 0.38 ± 0.18 | 0.2337 |
| PC/Pi | 0.65 ± 0.31 | 0.74 ± 0.34 | 0.3617 |
| PC/γ-ATP | 0.37 ± 0.20 | 0.37 ± 0.28 | 0.9902 |
| PE/PDE | 0.40 ± 0.30 | 0.73 ± 0.30 | **0.0012**** |
| PE/TPC | 0.09 ± 0.04 | 0.13 ± 0.05 | **0.0023**** |
| PE/(PME+PDE) | 0.22 ± 0.08 | 0.31 ± 0.09 | **0.0009**** |
| PE/GPC | 0.74 ± 0.50 | 1.31 ± 0.73 | **0.0056*** |
| PE/GPE | 0.83 ± 0.35 | 1.69 ± 0.77 | **< 0.0001***** |
| PE/PC | 1.34 ± 0.44 | 1.28 ± 0.68 | 0.7781 |
| PE/Pi | 0.99 ± 0.65 | 1.42 ± 0.64 | 0.0367 |
| PE/γ-ATP | 0.49 ± 0.23 | 0.68 ± 0.33 | 0.0279 |
| PDE/TPC | 0.25 ± 0.06 | 0.18 ± 0.07 | **0.0010**** |
| PDE/(PME+PDE) | 0.62 ± 0.11 | 0.42 ± 0.15 | **< 0.0001***** |
| PDE/γ-ATP | 1.34 ± 0.53 | 0.89 ± 0.37 | **0.0025**** |
| GPC/PME | 0.93 ± 0.41 | 0.51 ± 0.37 | **0.0013**** |
| GPC/TPC | 0.14 ± 0.04 | 0.10 ± 0.05 | **0.0119*** |
|  | **Early-Stage**  **(n = 23)** | **Advanced-Stage (n=21)** | ***p*** |
| GPC/(PME+PDE) | 0.35 ± 0.10 | 0.25 ± 0.12 | **0.0046*** |
| GPC/PDE | 0.57 ± 0.12 | 0.60 ± 0.18 | 0.4051 |
| GPC/Pi | 1.45 ± 0.54 | 1.09 ± 0.65 | 0.0543 |
| GPC/γ-ATP | 0.75 ± 0.33 | 0.53 ± 0.26 | 0.0184 |
| GPE/PME | 0.66 ± 0.27 | 0.34 ± 0.25 | **0.0003**** |
| GPE/TPC | 0.11 ± 0.04 | 0.07 ± 0.05 | **0.0066*** |
| GPE/(PME+PDE) | 0.27 ± 0.09 | 0.17 ± 0.09 | **0.0007**** |
| GPE/GPC | 0.83 ± 0.36 | 0.72 ± 0.45 | 0.3554 |
| GPE/PDE | 0.43 ± 0.12 | 0.40 ± 0.18 | 0.4051 |
| GPE/Pi | 1.06 ± 0.52 | 0.77 ± 0.59 | 0.1034 |
| GPE/γ-ATP | 0.56 ± 0.27 | 0.36 ± 0.24 | **0.0130*** |
| γ-ATP/TPC | 0.20 ± 0.05 | 0.20 ± 0.06 | 0.9398 |
| γ-ATP/(PME+PDE) | 0.48 ± 0.17 | 0.47 ± 0.18 | 0.8180 |
| Pi/PDE | 0.44 ± 0.17 | 0.62 ± 0.34 | 0.0306 |
| Pi/PME | 0.65 ± 0.25 | 0.46 ± 0.21 | **0.0115*** |
| Pi/TPC | 0.11 ± 0.04 | 0.10 ± 0.04 | 0.4988 |
| Pi/(PME+PDE) | 0.26 ± 0.08 | 0.24 ± 0.10 | 0.5104 |
| Pi/γ-ATP | 0.63 ± 0.36 | 0.55 ± 0.35 | 0.4635 |

Data are presented as medians with interquartile ranges or mean ± SD. For each patient, metabolite levels were averaged across lesion voxels. PME comprises PE and PC; and PDE comprises GPE and GPC; ATP, Adenosine triphosphate; GPC, glycerophosphocholine; GPE, glycerophosphoethanolamine; PC, phosphocholine; PDE, phosphodiesters; PE, phosphoethanolamine; Pi, inorganic phosphate; PME, phosphomonoesters; 31P 2D MRSI, phosphorus-31 two-dimensional magnetic resonance spectroscopic imaging; TPC, total phosphorus content.

**p* < 0.0167, ***p* < 0.0033, ****p* < 0.0003 (Mann–Whitney *U* test or independent-samples *t* test with a Bonferroni correction).

**Table S7.** Differences in 31P 2D MRSI metabolite ratios between low and high Ki-67 expression subgroups within the early-stage groups

|  | **Ki-67≤20% (n=13)** | **Ki-67>20% (n=10)** | ***p*** |
| --- | --- | --- | --- |
| PME/PDE | 0.51 ± 0.17 | 0.73 ± 0.21 | **0.0104*** |
| PME/TPC | 0.14 ± 0.02 | 0.16 ± 0.03 | 0.1979 |
| PME/(PME+PDE) | 0.33 ± 0.08 | 0.42 ± 0.07 | **0.0117*** |
| PME/γ-ATP | 0.69 ± 0.28 | 0.96 ± 0.38 | 0.0682 |
| PC/PDE | 0.24 ± 0.11 | 0.29 ± 0.12 | 0.2628 |
| PC/TPC | 0.06 ± 0.02 | 0.07 ± 0.03 | 0.4363 |
| PC/(PME+PDE) | 0.15 ± 0.06 | 0.17 ± 0.05 | 0.5517 |
| PC/GPC | 0.43 ± 0.21 | 0.54 ± 0.26 | 0.2784 |
| PC/GPE | 0.56 ± 0.31 | 0.78 ± 0.40 | 0.1534 |
| PC/PME | 0.45 ± 0.09 | 0.40 ± 0.11 | 0.2602 |
| PC/Pi | 0.53 ± 0.16 | 0.61 ± 0.21 | 0.3306 |
| PC/γ-ATP | 0.35 ± 0.20 | 0.40 ± 0.20 | 0.6202 |
| PE/PDE | 0.27 ± 0.09 | 0.44 ± 0.16 | **0.0037*** |
| PE/TPC | 0.07 ± 0.02 | 0.10 ± 0.03 | **0.0084*** |
| PE/(PME+PDE) | 0.18 ± 0.04 | 0.25 ± 0.07 | **0.0058*** |
| PE/GPC | 0.50 ± 0.19 | 0.78 ± 0.39 | 0.0402 |
| PE/GPE | 0.63 ± 0.26 | 1.08 ± 0.28 | **0.0010**** |
| PE/PC | 1.29 ± 0.47 | 1.40 ± 0.43 | 0.6049 |
| PE/Pi | 0.76 ± 0.32 | 0.78 ± 0.20 | 0.8447 |
| PE/γ-ATP | 0.37 ± 0.14 | 0.57 ± 0.22 | 0.0229 |
| PDE/TPC | 0.25 ± 0.07 | 0.24 ± 0.05 | 0.5772 |
| PDE/(PME+PDE) | 0.67 ± 0.08 | 0.58 ± 0.07 | **0.0117*** |
| PDE/γ-ATP | 1.41 ± 0.61 | 1.37 ± 0.56 | 0.8850 |
| GPC/PME | 1.14 ± 0.52 | 0.89 ± 0.51 | 0.2450 |
| GPC/TPC | 0.15 ± 0.04 | 0.13 ± 0.04 | 0.2289 |
| GPC/(PME+PDE) | 0.36 ± 0.08 | 0.31 ± 0.08 | 0.2202 |
|  | **Ki-67≤20% (n=13)** | **Ki-67>20% (n=10)** | ***p*** |
| GPC/PDE | 0.56 ± 0.09 | 0.57 ± 0.15 | 0.8617 |
| GPC/Pi | 1.52 ± 0.60 | 1.37 ± 0.46 | 0.5451 |
| GPC/γ-ATP | 0.78 ± 0.35 | 0.70 ± 0.31 | 0.5973 |
| GPE/PME | 0.93 ± 0.48 | 0.59 ± 0.19 | 0.0471 |
| GPE/TPC | 0.12 ± 0.05 | 0.10 ± 0.03 | 0.2494 |
| GPE/(PME+PDE) | 0.28 ± 0.09 | 0.24 ± 0.08 | 0.2739 |
| GPE/GPC | 0.82 ± 0.27 | 0.85 ± 0.47 | 0.8043 |
| GPE/PDE | 0.44 ± 0.09 | 0.43 ± 0.15 | 0.8617 |
| GPE/Pi | 1.11 ± 0.46 | 0.81 ± 0.34 | 0.1254 |
| GPE/γ-ATP | 0.62 ± 0.31 | 0.47 ± 0.18 | 0.2140 |
| γ-ATP/TPC | 0.20 ± 0.04 | 0.19 ± 0.05 | 0.8753 |
| γ-ATP/(PME+PDE) | 0.47 ± 0.14 | 0.49 ± 0.21 | 0.7729 |
| Pi/PDE | 0.39 ± 0.13 | 0.46 ± 0.16 | 0.3051 |
| Pi/PME | 0.80 ± 0.36 | 0.67 ± 0.32 | 0.3946 |
| Pi/TPC | 0.11 ± 0.04 | 0.11 ± 0.05 | 0.7995 |
| Pi/(PME+PDE) | 0.26 ± 0.08 | 0.27 ± 0.09 | 0.8001 |
| Pi/γ-ATP | 0.59 ± 0.35 | 0.67 ± 0.39 | 0.5929 |

Data are presented as medians with interquartile ranges or mean ± SD. For each patient, metabolite levels were averaged across lesion voxels. PME comprises PE and PC; and PDE comprises GPE and GPC. ATP, Adenosine triphosphate; GPC, glycerophosphocholine; GPE, glycerophosphoethanolamine; PC, phosphocholine; PDE, phosphodiesters; PE, phosphoethanolamine; Pi, inorganic phosphate; PME, phosphomonoesters; 31P 2D MRSI, phosphorus-31 two-dimensional magnetic resonance spectroscopic imaging; TPC, total phosphorus content.

**p* < 0.0167 (Mann–Whitney U test or independent-samples *t* test with a Bonferroni correction).

**Table S8.** Differences in 31P 2D MRSI metabolite ratios between response and nonresponse subgroups within the advanced-stage HCC lesions

|  | **Response (n=8)** | **Nonresponse (n=13)** | ***p*** |
| --- | --- | --- | --- |
| PME/PDE | 2.19 ± 0.50 | 1.05 ± 0.43 | **0.0001***** |
| PME/TPC | 0.32 ± 0.06 | 0.20 ± 0.06 | **0.0006**** |
| PME/(PME+PDE) | 0.73 ± 0.10 | 0.49 ± 0.11 | **0.0001***** |
| PME/γ-ATP | 1.87 ± 0.72 | 0.90 ± 0.48 | **0.0028**** |
| PC/PDE | 0.87 ± 0.39 | 0.42 ± 0.35 | **0.0167*** |
| PC/TPC | 0.13 ± 0.06 | 0.08 ± 0.06 | 0.1009 |
| PC/(PME+PDE) | 0.27 ± 0.13 | 0.19 ± 0.13 | 0.2128 |
| PC/GPC | 1.61 ± 0.69 | 0.77 ± 0.70 | 0.0191 |
| PC/GPE | 1.83 ± 1.01 | 0.98 ± 0.84 | 0.0748 |
| PC/PME | 0.43 ± 0.20 | 0.32 ± 0.17 | 0.2278 |
| PC/Pi | 0.78 ± 0.34 | 0.72 ± 0.35 | 0.6934 |
| PC/γ-ATP | 0.68 ± 0.43 | 0.38 ± 0.38 | 0.1411 |
| PE/PDE | 1.02 ± 0.23 | 0.63 ± 0.26 | **0.0104*** |
| PE/TPC | 0.19 ± 0.06 | 0.12 ± 0.04 | **0.0064*** |
| PE/(PME+PDE) | 0.34 ± 0.07 | 0.32 ± 0.07 | 0.7306 |
| PE/GPC | 2.85 ± 1.51 | 1.14 ± 0.62 | **0.0020**** |
| PE/GPE | 2.79 ± 1.43 | 1.81 ± 1.27 | 0.1729 |
| PE/PC | 2.24 ± 2.45 | 1.93 ± 1.29 | 0.7240 |
| PE/Pi | 1.33 ± 0.63 | 1.47 ± 0.66 | 0.6563 |
| PE/γ-ATP | 1.04 ± 0.20 | 0.52 ± 0.24 | **0.0002***** |
| PDE/TPC | 0.13 ± 0.06 | 0.18 ± 0.04 | 0.0325 |
| PDE/(PME+PDE) | 0.27 ± 0.10 | 0.51 ± 0.11 | **0.0001***** |
| PDE/γ-ATP | 0.88 ± 0.46 | 0.89 ± 0.32 | 0.9266 |
| GPC/PME | 0.22 ± 0.10 | 0.63 ± 0.28 | **0.0011**** |
| GPC/TPC | 0.07 ± 0.03 | 0.11 ± 0.04 | 0.0242 |
| GPC/(PME+PDE) | 0.16 ± 0.07 | 0.31 ± 0.10 | **0.0016**** |
|  | **Response (n=8)** | **Nonresponse (n=13)** | ***p*** |
| GPE/GPC | 0.63 ± 0.46 | 0.76 ± 0.46 | 0.5303 |
| GPE/PDE | 0.39 ± 0.22 | 0.40 ± 0.15 | 0.9339 |
| GPE/Pi | 0.40 ± 0.29 | 1.01 ± 0.62 | 0.0179 |
| GPE/γ-ATP | 0.27 (0.12, 0.47) | 0.41 (0.18, 0.45) | 0.5466 |
| γ-ATP/TPC | 0.16 ± 0.05 | 0.24 ± 0.06 | **0.0039*** |
| γ-ATP/(PME+PDE) | 0.35 ± 0.15 | 0.55 ± 0.16 | **0.0137*** |
| Pi/PDE | 0.96 ± 0.25 | 0.46 ± 0.24 | **0.0005**** |
| Pi/PME | 0.46 ± 0.12 | 0.44 ± 0.06 | 0.7384 |
| Pi/TPC | 0.13 ± 0.04 | 0.09 ± 0.04 | 0.0475 |
| Pi/(PME+PDE) | 0.28 ± 0.12 | 0.22 ± 0.09 | 0.1910 |
| Pi/γ-ATP | 0.79 ± 0.33 | 0.41 ± 0.29 | **0.0154*** |

Data are presented as medians with interquartile ranges or mean ± SD. For each patient, metabolite levels were averaged across lesion voxels. PME comprises PE and PC; and PDE comprises GPE and GPC. ATP, Adenosine triphosphate; GPC, glycerophosphocholine; GPE, glycerophosphoethanolamine; PC, phosphocholine; PDE, phosphodiesters; PE, phosphoethanolamine; Pi, inorganic phosphate; PME, phosphomonoesters; 31P 2D MRSI, phosphorus-31 two-dimensional magnetic resonance spectroscopic imaging; TPC, total phosphorus content.

**p* < 0.0167, ***p* < 0.0033, ****p* < 0.0003 (Mann–Whitney *U* test or independent-samples *t* test with a Bonferroni correction).
